# Supplementary material for: Simulated anthropogenic CO 2 storage and acidification of the Mediterranean Sea
Source: Copernicus journal article supplement (doi:10.5194/bg-12-781-2015), 2015-02-10
Supplement: Supplementary file 1 [file bg-12-781-2015-supplement.zip]

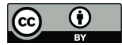

## *Supplement of*

# **Simulated anthropogenic CO<sub>2</sub> storage and acidification of the Mediterranean Sea**

**J. Palmiéri et al.**

*Correspondence to:* J. Palmiéri (julien.palmieri@lsce.ipsl.fr)

- bg-12-781-2015-supplement-cover-letter.pdf
- Supplementary\_material\_Palmieri\_et\_al\_CO2\_anthr\_in\_Med
  - READ\_ME.pdf
  - supplementary\_material\_CO2\_anthr\_GLO\_MED.html
  - supplementary\_material\_CO2\_anthr\_GLO\_MED.ipynb
  - supplementary\_material\_CO2\_anthr\_GLO\_MED\_fichiers
    - \* MathJax.js
    - \* backbone-min.js
    - \* bootstrap-tour.css
    - \* bootstrap-tour.js
    - \* bootstrap.js
    - \* cell.js
    - \* celltoolbar.js
    - \* closebrackets.js
    - \* codecell.js
    - \* codemirror-ipython.js
    - \* codemirror.css
    - \* codemirror.js
    - \* comm.js
    - \* comment.js
    - \* completer.js
    - \* config.js
    - \* contexthint.js
    - \* css.js
    - \* custom.css
    - \* custom.js
    - \* date.js

- \* default.js
- \* dialog.js
- \* events.js
- \* gfm.js
- \* highlight.js
- \* html-css-sanitizer-minified.js
- \* htmlmixed.js
- \* init.js
- \* ipynblogo.png
- \* javascript.js
- \* jquery-ui.css
- \* jquery-ui.js
- \* jquery.js
- \* kernel.js
- \* keyboard.js
- \* keyboardmanager.js
- \* layoutmanager.js
- \* loadmode.js
- \* loginwidget.js
- \* main.js
- \* maintoolbar.js
- \* manager.js
- \* markdown.js
- \* marked.js
- \* matchbrackets.js
- \* mathjaxutils.js
- \* menubar.js
- \* multiplex.js
- \* namespace.js
- \* notebook.js
- \* notificationarea.js
- \* notificationwidget.js
- \* outputarea.js
- \* overlay.js
- \* override.css
- \* page.js
- \* pager.js
- \* python.js
- \* quickhelp.js
- \* r.js
- \* rawcell.js
- \* require.js
- \* rst.js
- \* savewidget.js
- \* security.js
- \* session.js
- \* slideshow.js

- \* style.css
- \* textcell.js
- \* toolbar.js
- \* tooltip.js
- \* tour.js
- \* underscore-min.js
- \* utils.js
- \* widget.js
- \* widget\_bool.js
- \* widget\_button.js
- \* widget\_container.js
- \* widget\_float.js
- \* widget\_image.js
- \* widget\_int.js
- \* widget\_selection.js
- \* widget\_selectioncontainer.js
- \* widget\_string.js
- \* xml.js
- supplementary\_material\_CO2\_anthr\_VAR.html
- supplementary\_material\_CO2\_anthr\_VAR.ipynb
- supplementary\_material\_CO2\_anthr\_VAR\_fichiers
  - \* MathJax.js
  - \* backbone-min.js
  - \* bootstrap-tour.css
  - \* bootstrap-tour.js
  - \* bootstrap.js
  - \* cell.js
  - \* celltoolbar.js
  - \* closebrackets.js
  - \* codecell.js
  - \* codemirror-ipython.js
  - \* codemirror.css
  - \* codemirror.js
  - \* comm.js
  - \* comment.js
  - \* completer.js
  - \* config.js
  - \* contexthint.js
  - \* css.js
  - \* custom.css
  - \* custom.js
  - \* date.js
  - \* default.js
  - \* dialog.js
  - \* events.js
  - \* gfm.js
  - \* highlight.js

- \* html-css-sanitizer-minified.js
- \* htmlmixed.js
- \* init.js
- \* ipynbloggo.png
- \* javascript.js
- \* jquery-ui.css
- \* jquery-ui.js
- \* jquery.js
- \* kernel.js
- \* keyboard.js
- \* keyboardmanager.js
- \* layoutmanager.js
- \* loadmode.js
- \* loginwidget.js
- \* main.js
- \* maintoolbar.js
- \* manager.js
- \* markdown.js
- \* marked.js
- \* matchbrackets.js
- \* mathjaxutils.js
- \* menubar.js
- \* multiplex.js
- \* namespace.js
- \* notebook.js
- \* notificationarea.js
- \* notificationwidget.js
- \* outputarea.js
- \* overlay.js
- \* override.css
- \* page.js
- \* pager.js
- \* python.js
- \* quickhelp.js
- \* r.js
- \* rawcell.js
- \* require.js
- \* rst.js
- \* savewidget.js
- \* security.js
- \* session.js
- \* slideshow.js
- \* style.css
- \* textcell.js
- \* toolbar.js
- \* tooltip.js
- \* tour.js

- \* underscore-min.js
- \* utils.js
- \* widget.js
- \* widget\_bool.js
- \* widget\_button.js
- \* widget\_container.js
- \* widget\_float.js
- \* widget\_image.js
- \* widget\_int.js
- \* widget\_selection.js
- \* widget\_selectioncontainer.js
- \* widget\_string.js
- \* xml.js
