# Supplementary material for: Simulated anthropogenic CO 2 storage and acidification of the Mediterranean Sea
Source: Copernicus journal article supplement (doi:10.5194/bg-12-781-2015), 2015-02-10
Supplement: Supplementary file 2 [file bg-12-781-2015-supplement.zip]

# Simulated anthropogenic CO<sub>2</sub> storage and acidification of the Mediterranean Sea

## Supplementary materials

### List of documents:

In the supplementary materials are 4 files, and 2 directories:

- the 2 .ipynb files are python notebooks, where we explain how the calculation of  $z_0$  and  $z_1$  (Eq. 6 of the paper) of the standard perturbation approaches (GLO and MED) have been done (see `supplementary_material_CO2_anthr_GLO_MED.ipynb`), and the same for  $z_1$ ,  $z_2$  and  $z_3$  coefficients of the VAR approach (see `supplementary_material_CO2_anthr_VAR.ipynb`).  
To run those notebooks on your computer, you will need to have specific (but free and open sources) softwares on your computer: python, ipython, ipython--notebook, and r2py.python.  
Once everything is installed, and well configured, you will be able to reproduce what have been done to calculate those coefficients, and even modify the script for your own experiments.  
Every steps of the script are well documented within the script.
- the 2 html files should be opened with a web navigator (double click on the files). This will reproduce a fixed working version of the corresponding notebook.
- All the files in the directories are needed by the web navigator, to reproduce the fixed notebook version from the html file.

here is an explanation about what a notebook is : <http://ipython.org/notebook.html>
